# Supplementary material for: A plug-and-play chemobiocatalytic route for the one-pot controllable synthesis of biobased C4 chemicals from furfural
Source: Royal Society of Chemistry journal article supplement (doi:10.1039/d1gc03001a), 2021-01-01
Supplement: d1gc03001a1.pdf [file d1gc03001a1.pdf]

## Supporting Information

# A plug-and-play chemobiocatalytic route for one-pot controllable synthesis of biobased C4 chemicals from furfural

Yi-Min Huang,<sup>1</sup> Guang-Hui Lu,<sup>1</sup> Min-Hua Zong,<sup>1</sup> Wen-Jing Cui,<sup>1</sup> Ning Li<sup>\*1</sup>

<sup>1</sup> School of Food Science and Engineering, South China University of Technology, 381 Wushan Road, Guangzhou 510640, China

<sup>2</sup> Key Laboratory of Industrial Biotechnology (Ministry of Education), School of Biotechnology, Jiangnan University, 1800 Lihu Avenue, Wuxi 214122, China

\* Corresponding author, E-mail: [lining@scut.edu.cn](mailto:lining@scut.edu.cn)

### Materials

Furfural (99%), EY (80%), RB (95%), HFO (98%),  $\beta$ -Ala (99%) and IRA-900 were purchased from Macklin Biochemical Co., Ltd. (Shanghai, China). FCA (98%), L- and D-Asp (99%) were from Aladdin Biochemical Co., Ltd. (Shanghai, China). MA (98%) and FA (99%) were from Sangon Biotech Co., Ltd. (Shanghai, China). DVB was from Dingguo Changsheng Biotechnology Co., Ltd. (Beijing, China). TEMPO (98%) was from Sigma-Aldrich (USA). All other chemicals used in this study were of analytical grade. Laccase from *Trametes* sp. that contains approximately 18 mg protein per g crude enzyme is a gift from Amano Enzyme Inc. (Japan). The recombinant strain *E. coli*\_CtVDH2\_NOX and the plasmids p43E\_EcAspA and pET24a\_CgPanD were recently constructed by us.<sup>1-3</sup> Their gene sequences were available in supporting information.

### One-pot photobiocatalytic synthesis of HFO

**HFO synthesis in a concurrent mode:** 4 mL of phosphate buffer (0.2 M, pH 7) containing 50-150 mM furfural, 50 mg/mL (wet cell weight) *E. coli*\_CtVDH2\_NOX cells and 2 mol% photocatalyst (EY / RB) was irradiated under 30 W green LEDs (530-540 nm) at 25 °C for 9 h. Aliquots were withdrawn at specified time intervals from the reaction mixtures, and then diluted with the corresponding mobile phase prior to HPLC analysis. All the experiments were conducted at least in duplicate, and all the data were the averages of experimental results. The yields were determined by HPLC, based on the corresponding calibration curves.

**HFO synthesis in a stepwise mode:** 4 mL of phosphate buffer (0.2 M, pH 7) containing 100-200 mM furfural and 50 mg/mL (wet cell weight) *E. coli*\_CtVDH2\_NOX cells was incubated at 150 r/min and 30 °C for 4-9 h (tuning pH to 7 every 2 h). After the reaction, the cells were removed by centrifugation (8000 r/min, 4 °C, 10 min), followed by adding 30% acetone and 2 mol% photocatalyst. The reaction mixtures were irradiated under 30 W green LEDs (530-540 nm) at 25 °C for 18-36 h. Aliquots were withdrawn at specified time intervals from the reaction mixtures, and then diluted with the corresponding mobile phase for HPLC analysis. All the experiments were conducted at least in duplicate. The yields were determined by HPLC, based on the corresponding calibration curves.

#### **One-pot, three-step synthesis of MA**

Typically, 4 mL of phosphate buffer (0.2 M, pH 7) containing 100 mM furfural and 50 mg/mL (wet cell weight) *E. coli*\_CtVDH2\_NOX cells was incubated at 150 r/min and 30 °C (tuning pH to 7 every 2 h). After 4 h, the cells were removed by centrifugation (8000 r/min, 4 °C, 10 min), followed by adding 30% acetone and 2 mol% photocatalyst. The reaction mixtures were irradiated under 30 W green LEDs (530-540 nm) at 25 °C for 18 h. Then, the pH of the mixtures was tuned to 5.0, followed by adding 5 mg/mL laccase and 20-100 mol% TEMPO; the reaction mixtures were incubated at 150 r/min and 30 °C for 12-120 h. Aliquots were withdrawn at specified time intervals from the reaction mixtures, and then diluted with the corresponding mobile phase for HPLC analysis. All the experiments were conducted at least in duplicate. The yields were determined by HPLC, based on the corresponding calibration curves.

#### **One-pot synthesis of FSA and FA**

Typically, 4 mL of phosphate buffer (0.2 M, pH 7) containing 50-100 mM furfural and 50 mg/mL (wet cell weight) *E. coli*\_CtVDH2\_NOX cells was incubated at 150 r/min and 30 °C for 2-4 (tuning pH to 7 every 2 h). Then, the cells were removed by centrifugation (8000 r/min, 4 °C, 10 min), followed by adding 2-10 mol% EY@DVB. The reaction mixtures were irradiated under 30 W green LEDs (530-540 nm) at 25 °C and 200 r/min for 24-48 h.

For FA synthesis, the pH of the above mixtures was tuned to 5.0, followed by adding 5 mg/mL laccase and 40-100 mol% TEMPO; the reaction mixtures were incubated at 150 r/min and 30 °C for 6-24 h. Aliquots were withdrawn at specified time intervals from the reaction mixtures, and then diluted with the corresponding mobile phase for HPLC analysis. All the experiments were conducted at least in duplicate. The yields were determined by HPLC, based on the corresponding calibration curves.

#### **One-pot synthesis of HBEA, and HBA**

**HBEA synthesis:** 4 mL of phosphate buffer (0.2 M, pH 7) containing 50 mM furfural and 50 mg/mL (wet cell weight) *E. coli*\_CtVDH2\_NOX cells was incubated at 150 r/min and 30 °C for 2. Then, the cells were removed by centrifugation (8000 r/min, 4 °C, 10 min), followed by adding 5 mol% EY@DVB. The reaction mixtures were irradiated under 30 W green LEDs (530-540 nm) at 25 °C and 200 r/min for 24 h. Finally, 1.2 equivalent of NaBH<sub>4</sub> was added to the reaction mixtures, followed by incubation at 150 r/min and 30 °C. After 1 h, almost all FSA was converted to HBEA, based on NMR analysis.

**HBA synthesis:** 4 mL of phosphate buffer (0.2 M, pH 7) containing 50 mM furfural and 50

mg/mL (wet cell weight) *E. coli*\_CtVDH2\_NOX cells was incubated at 150 r/min and 30 °C for 2. Then, the cells were removed by centrifugation (8000 r/min, 4 °C, 10 min), followed by adding 5 mol% EY@DVB. The reaction mixtures were irradiated under 30 W green LEDs (530-540 nm) at 25 °C and 200 r/min for 24 h. Finally, 1 mL methanol, 3 mM CuCl and 2.5 equivalent of NaBH<sub>4</sub> was added to the reaction mixtures, followed by incubation at 150 r/min and 30 °C. After 0.5 h, almost all FSA was converted to HBA, based on HPLC analysis. The yields were determined by HPLC, based on the corresponding calibration curves.

### **One-pot, four-step synthesis of biobased L-Asp**

Generally, 4 mL of phosphate buffer (0.2 M, pH 7) containing 50 mM furfural and 50 mg/mL (wet cell weight) *E. coli*\_CtVDH2\_NOX cells was incubated at 150 r/min and 30 °C. After 2 h, the cells were removed by centrifugation (8000 r/min, 4 °C, 10 min), followed by adding 5 mol% EY@DVB. The reaction mixtures were irradiated under 30 W green LEDs (530-540 nm) at 200 r/min and 25 °C. After 24 h, tuning pH to 5 was conducted, followed by adding 5 mg/mL of laccase and 80 mol% of TEMPO; then the reaction mixtures were incubated for 12 h at 150 r/min and 30 °C. Then, approximately 350 mM aqueous ammonia was added to tune pH to 8.5, followed by adding 50 mg/mL (wet cell weight) *E. coli*\_EcAspA cells and 1 mM MgCl<sub>2</sub>; the mixtures were incubated at 150 r/min, and 30 °C for 2 h. Aliquots were withdrawn at specified time intervals from the reaction mixtures, and then diluted with the corresponding mobile phase prior to HPLC analysis. All the experiments were conducted at least in duplicate, and all the data were the averages of experimental results. The yields were determined by HPLC, based on the corresponding calibration curves.

### **One-pot synthesis of β-Ala**

Generally, 4 mL of phosphate buffer (0.2 M, pH 7) containing 50 mM furfural and 50 mg/mL (wet cell weight) *E. coli*\_CtVDH2\_NOX cells was incubated at 150 r/min and 30 °C. After 2 h, the cells were removed by centrifugation (8000 r/min, 4 °C, 10 min), followed by adding 5 mol% EY@DVB. The reaction mixtures were irradiated under 30 W green LEDs (530-540 nm) at 200 r/min and 25 °C. After 24 h, tuning pH to 5 was conducted, followed by adding 5 mg/mL of laccase and 80 mol% of TEMPO; then the reaction mixtures were incubated for 12 h at 150 r/min and 30 °C. Then, approximately 200 mM aqueous ammonia was added to tune pH to 7, followed by adding 50 mg/mL (wet cell weight) *E. coli*\_EcAspA cells, 50 mg/mL *E. coli*\_CgPanD and 1 mM MgCl<sub>2</sub>; the mixtures were incubated at 150 r/min, and 30 °C for 12 h. Aliquots were withdrawn at specified time intervals from the reaction mixtures, and then diluted with the corresponding mobile phase for HPLC analysis. All the experiments were conducted at least in duplicate. The yields were determined by HPLC, based on the corresponding calibration curves.

### **Scale-up synthesis of L-Asp**

Phosphate buffer (0.2 M, pH 7, 50 mL) containing 100 mM furfural and 50 mg/mL (wet cell weight) *E. coli*\_CtVDH2\_NOX cells was incubated at 150 r/min and 30 °C. After 4 h, the cells were removed by centrifugation (8000 r/min, 4 °C, 10 min), followed by adding 5 mol% EY@DVB. The reaction mixture was irradiated under 30 W green LEDs (530-540 nm) at 200

r/min and 25 °C. After 60 h, tuning pH to 5 was conducted, followed by adding 5 mg/mL of laccase and 80 mol% of TEMPO; then the reaction mixture was incubated for 24 h at 150 r/min and 30 °C. Then, approximately 350 mM aqueous ammonia was added to tune pH to 8.5, followed by adding 50 mg/mL (wet cell weight) *E. coli*/EcAspA cells and 1 mM MgCl<sub>2</sub>; the mixture was incubated at 150 r/min, and 30 °C for 4 h. The crude product of 233 mg (an isolated yield of 36%) was isolated from the reaction mixture through isoelectronic point precipitation (pH 2.8) by adding H<sub>2</sub>SO<sub>4</sub>.

### **Derivatization of amino acids**

0.1 mM phenyl isothiocyanate (PITC) solution: 1 mL of PITC (99%; Aladdin, Shanghai, China) was added to 83 mL of chromatographically pure acetonitrile, mixed, and stored under 4 °C and dark conditions.

1 mM triethylamine (TEA) solution: 14 mL of chromatographically pure TEA was added to 86 mL of chromatographically pure acetonitrile, mixed, and stored under 4 °C and dark conditions.

Derivatization steps: 0.25 mL of PITC solution and 0.25 mL TEA solution were added to 0.5 mL of the reaction mixtures, and settled for 1 h under dark condition. Upon the reaction, 0.7 mL hexane was added and mixed; after phase separation, the aqueous phase was subjected to HPLC analysis.

### **HPLC analysis**

The reaction mixtures were analyzed on a Zorbax Eclipse XDB-C18 column (4.6 mm × 250 mm, 5 μm, Agilent, USA) by using a reversed phase HPLC equipped with a Waters 996 photodiode array detector (Waters, USA). The column temperature was 35 °C. For quantitative analysis of furfural, FCA, HFO and FSA, the mixture of acetonitrile/0.4% (NH<sub>4</sub>)<sub>2</sub>SO<sub>4</sub> solution with pH 3.5 (10:90, v/v) was used as the mobile phase at the flow rate of 0.6 mL/min. The retention times of furfural (maximum absorption wavelength: 278 nm), FCA (246 nm), HFO (210 nm) and FSA (219 nm) are 12.10, 5.91, 4.82 and 4.16 min, respectively. The mixture of acetonitrile/0.4% (NH<sub>4</sub>)<sub>2</sub>SO<sub>4</sub> solution with pH 3.5 (5:95, v/v) at a flow rate of 0.6 mL/min was used as the mobile phase for quantifying FA (210 nm), while the mixture of methanol/0.02% phosphoric acid solution (5:95, v/v) at the same flow rate was used for quantifying MA (210 nm). The retention times of FA and MA are 4.75 and 8.28 min, respectively. Prior to analyzing amino acids, the derivatization was conducted using PITC under basic conditions (see **Derivatization of amino acids** for details). The mixture of acetonitrile/0.1 M sodium acetate solution (7:93, v/v) at a flow rate of 0.6 mL/min was used for quantitatively analyzing L-Asp and β-Ala at 240 nm. The retention time of L-Asp and β-Ala are 5.51 and 18.53 min, respectively. For determining the configuration of aspartic acid (no requirement of derivatization), the reaction mixtures were analyzed on a Chirex 3126 column (Phenomenex, USA) by using HPLC (Agilent, USA) at 254 nm, with 0.2 mL/min of the mixture of 2 mM CuSO<sub>4</sub> solution/isopropanol (9:1, v/v) as the mobile phase. The retention times of L- and D-aspartic acid were 27.90 and 30.12 min, respectively.

### **HPLC analysis for Scheme 2B**

The reaction mixtures were analyzed on a Zorbax Eclipse XDB-C18 column (4.6 mm × 250

mm, 5  $\mu$ m, Agilent, USA) by using a reversed phase HPLC equipped with a Waters 2489 UV/Visible detector (Waters, USA). The column temperature was 35 °C. The mixture of acetonitrile/0.4% (NH<sub>4</sub>)<sub>2</sub>SO<sub>4</sub> solution with pH 3.5 (5:95, v/v) was used as the mobile phase at the flow rate of 0.6 mL/min. The derivatization using PITC was carried out prior to L-Asp analysis.

#### **Construction and cultivation of recombinant *E. coli* EcAspA strain**

The primer (P1: 5'-GTGGACAGCAAATGGGTCGCGGATCCATGTCAAACAACATTCGTATCG AAGA-3'; P2: 5'-TGGTGGTGGTGGTGGTGGTCTCGAGTGCGGCCGCAAGCTTTTACTGTTCGCTT CATCAGT-3') was designed on the basis of the gene sequence of the plasmid p43E\_EcAspA and synthesized by Sangon Biotech (Shanghai, China). The gene EcaspA was amplified with the plasmid p43E\_EcAspA as template. Then, the PCR product were double-digested using the restriction enzymes BamH I and Hind III; then, the resulting product was linked with the expression vector pET28a that was digested with the same restriction endonucleases. The resulting recombinant plasmid pET28a\_EcaspA was verified by restriction analysis and nucleotide sequencing.

The recombinant plasmid was transformed into *E. coli* BL21(DE3) and pre-cultivated in 30 mL Luria-Bertani (LB) medium containing 30 mg/L kanamycin at 37 °C and 180 r/min overnight. Then, 100 mL LB medium containing 30 mg/L kanamycin was inoculated with 1 mL of an overnight culture. Cells were grown at 37 °C and 180 r/min. When the optical density at 600 nm (OD<sub>600</sub>) reached 0.6-0.8, IPTG was added for inducing protein expression at the final concentration of 0.2 mM, followed by incubation at 24 °C and 180 r/min for 20 h. The cells were harvested by centrifugation (8000 r/min, 5 min, 4 °C) and washed twice with 0.85% NaCl solution.

#### **Cultivation of *E. coli* CtVDH2\_NOX and *E. coli* CgPanD**

Cultivation of *E. coli* CtVDH2\_NOX was conducted according to a recent method.<sup>3</sup> Briefly, recombinant *E. coli* CtVDH2\_NOX cells were pre-cultivated overnight in 30 mL of LB medium containing 100 mg/L ampicillin at 37 °C and 180 r/min. Then, 100 mL LB medium containing 100 mg/L ampicillin was inoculated with 1 mL of the overnight culture, followed by cultivation at 37 °C and 180 r/min. When the optical density at 600 nm (OD<sub>600</sub>) reached 0.6-0.8, IPTG (as inducer) was added to the medium at a final concentration of 0.1 mM, followed by induction at 20 °C and 160 r/min for 20 h. The cells were harvested by centrifugation (8000 r/min, 5 min, 4 °C) and washed twice with 0.85% NaCl solution.

Cultivation conditions of *E. coli* CgPanD was similar to those of *E. coli* EcAspA, with the exception of 0.8 mM of IPTG and the induction temperature of 37 °C.

The gene sequences of EcAspA and CgPanD were showed as below.

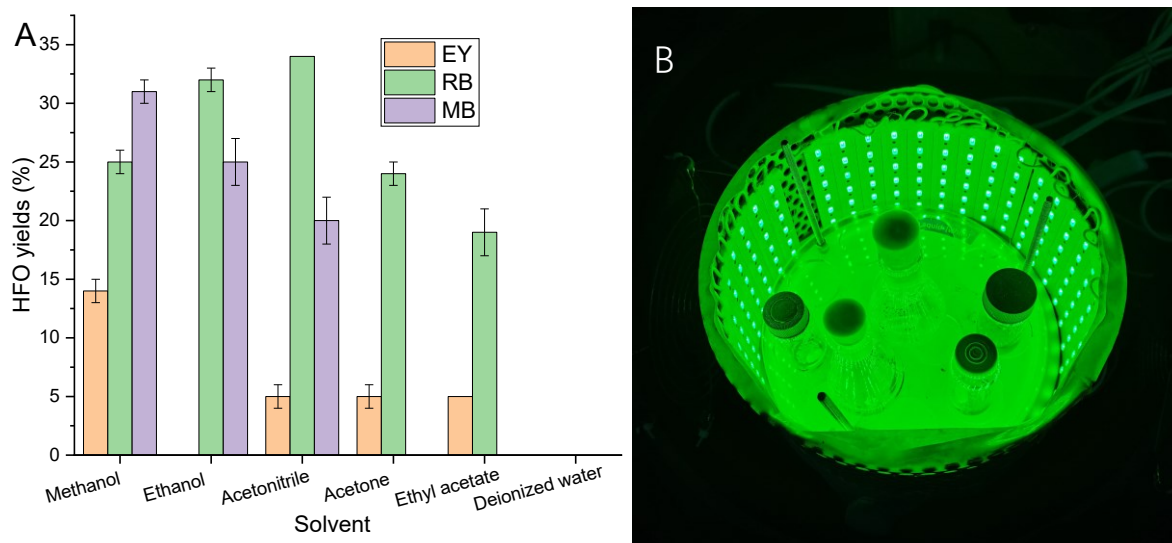

**Figure S1.** Effect of solvents on photocatalytic synthesis of HFO (A) and the homemade photoreactor (B). Reaction conditions: 10 mM furfural, 2 mol% photocatalyst, 5 mL solvent, 30 W green LEDs (530-540 nm), 25 °C, 6 h. Ethanol used herein refers to 95% ethanol; EY, EY; RB, Rose Bengal; MB, methylene blue.

**Table S1.** Effect of solvents on photocatalytic synthesis of HFO

| Entry | Photocatalyst | Solvent                       | HFO yield (%) |
|-------|---------------|-------------------------------|---------------|
| 1     | RB            | Methanol                      | 96            |
| 2     | RB            | Ethanol <sup>a</sup>          | 96            |
| 3     | RB            | Acetonitrile                  | 97            |
| 4     | RB            | Acetone                       | 96            |
| 5     | RB            | Ethyl acetate                 | 97            |
| 6     | RB            | N,N-Dimethylformamide         | 98            |
| 7     | RB            | Tetrahydrofuran               | 95            |
| 8     | RB            | 2-Methyltetrahydrofuran       | 95            |
| 9     | RB            | $\gamma$ -Valerolactone       | 87            |
| 10    | RB            | H <sub>2</sub> O <sup>b</sup> | 26            |
| 11    | EY            | Methanol                      | 94            |
| 12    | EY            | Ethyl acetate                 | 90            |
| 13    | EY            | Dimethyl carbonate            | 91            |
| 14    | EY            | $\gamma$ -Valerolactone       | 90            |
| 15    | EY            | H <sub>2</sub> O <sup>b</sup> | 23            |

Reaction conditions: 10 mM FCA, 2 mol% photocatalyst, 5 mL solvent, 30 W green LEDs (530-540 nm), 25 °C, 6 h. <sup>a</sup>95% ethanol. <sup>b</sup> Deionized water

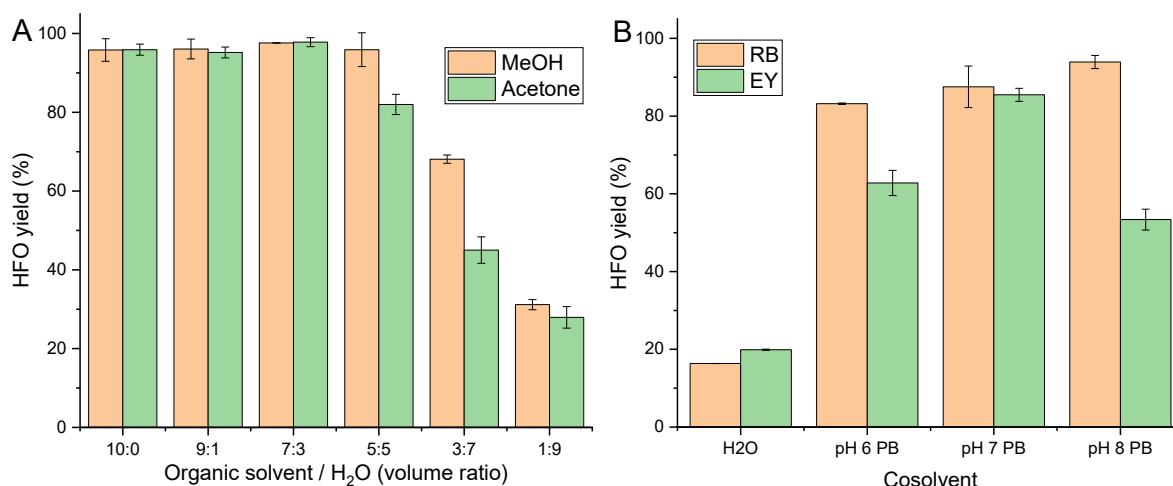

**Figure S2.** Photocatalytic synthesis of HFO from FCA in organic solvent aqueous solutions: (A) the effect of the volume ratio of organic solvent to deionized H<sub>2</sub>O; (B) comparison of the effect of deionized H<sub>2</sub>O and phosphate buffer. Reaction conditions for Figure S2A: 10 mM FCA, 2 mol% RB, 5 mL the mixture of organic solvent and water, 30 W green LEDs (530–540 nm), 25 °C, 6 h; reaction conditions for Figure S2B: 50 mM FCA, 2 mol% RB / EY, 4 mL aqueous solution containing 30% acetone, 30 W green LEDs (530–540 nm), 25 °C, 9 h. PB: 200 mM phosphate buffer.

**Table S2.** Immobilization of EY on different polymers

| Polymer | EY (mg) | Amount of EY immobilized per gram of resin (mg/g) |
|---------|---------|---------------------------------------------------|
| IRA-900 | 300     | 295                                               |
| NKA-II  | 300     | 102                                               |
| DVB     | 300     | 299                                               |

Conditions: 300 mg EY, 1 g polymer (IRA-900, Amberlite® IRA-900 anion exchange resin; NKA-II, NKA-II macroporous adsorption resin; DVB, Styrene DVB D392 weakly basic anion resin based on a styrene-divinylbenzene copolymer), 40 mL deionized water, 30 °C, 100 r/min, 10 h.

**Table S3.** The photosensitizer leakage from polymer-supported EY

| Polymer-supported EY | Loss of EY (%) |
|----------------------|----------------|
| EY@IRA-900           | 1              |
| EY@NKA-II            | 2              |
| EY@DVB               | 3              |

Conditions: The concentration of EY present in solution was determined after 10 mL of phosphate buffer (0.2 M, pH 7) containing 10 mg polymer-supported EY was incubated at 30 °C, 100 r/min for 10 h.





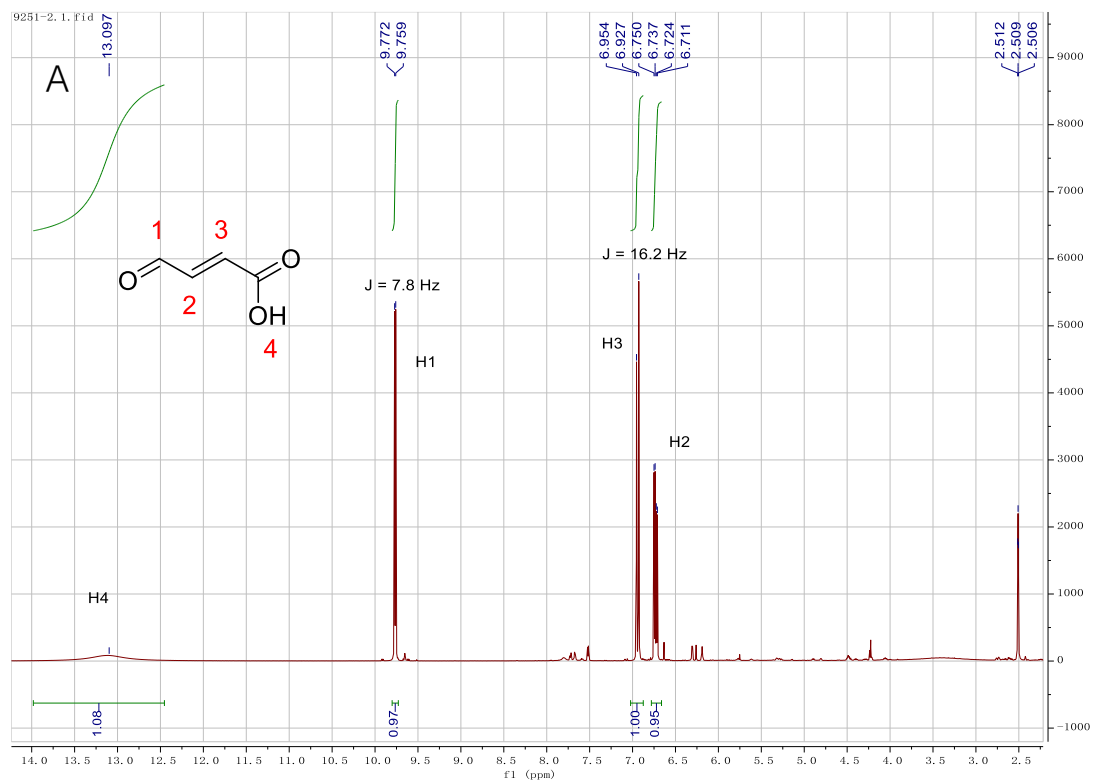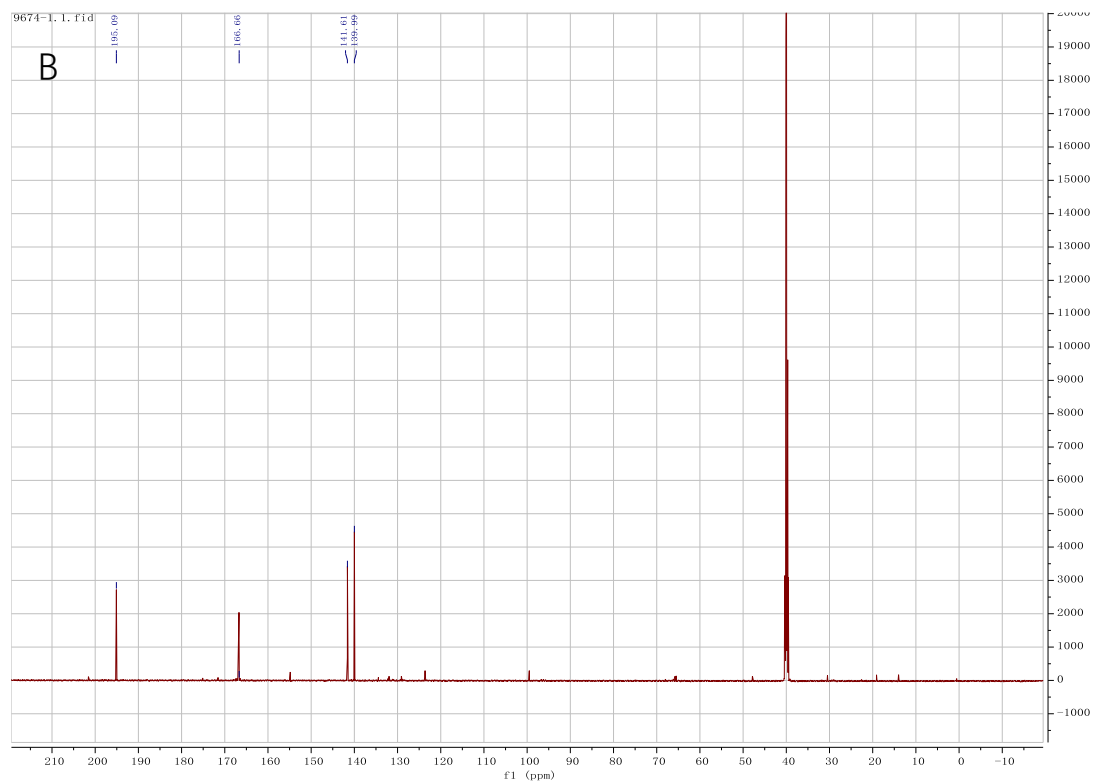

Figure S5.  $^1\text{H}$  (A) and  $^{13}\text{C}$  NMR (B) spectra of FSA (in  $d_6$ -DMSO, 600 MHz)

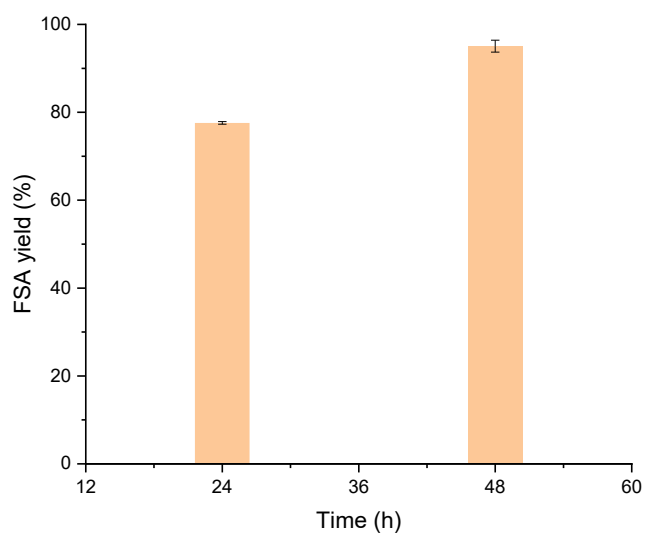

**Figure S6.** Synthesis of FSA from HFO by DVB. Reaction conditions: 10 mM HFO, 1.8 mg DVB (corresponding to the amount of polymer present in 2 mol% EY@DVB), 4 mL phosphate buffer (0.2 M, pH 7), 30 °C, 150 r/min.

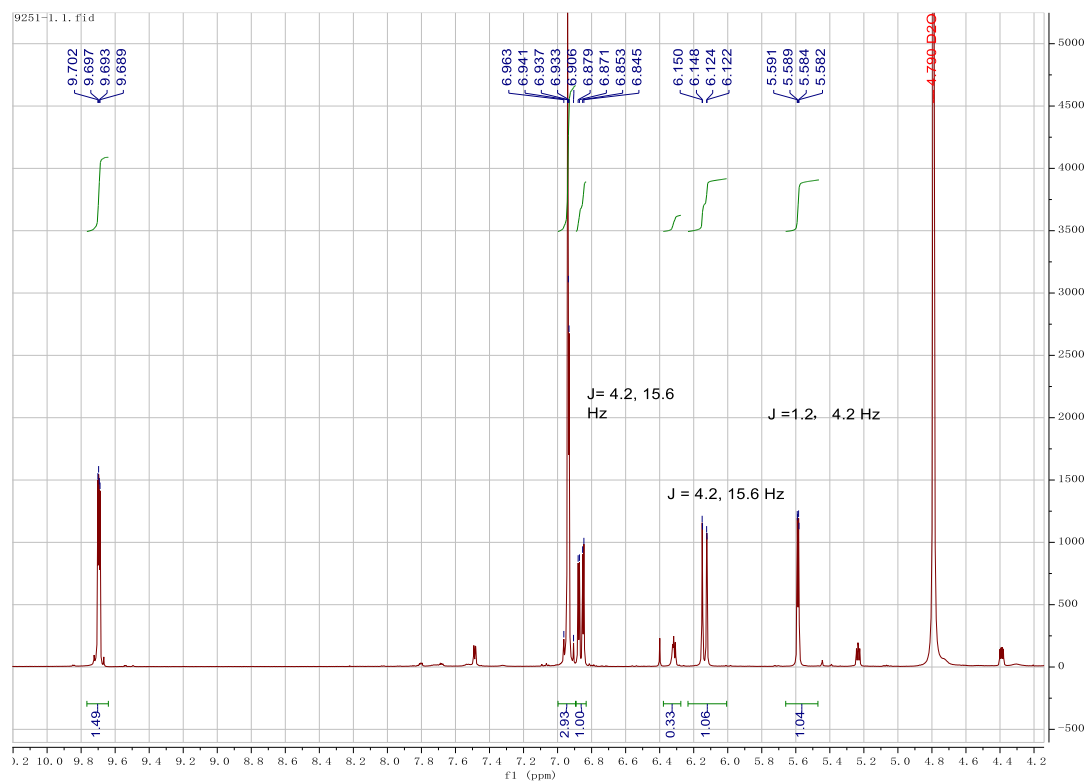

**Figure S7.**  $^1\text{H}$  NMR spectrum of FSA (in  $\text{D}_2\text{O}$ , 600 MHz)

The chemical shift of the proton present in the formyl group of FSA was changed from 9.69 ppm to 5.58 ppm upon hydration. Based on the ratio of the integration of the peak at 5.58 ppm to the sum of the peak integrations at 5.58 and 9.69, the hydration level is around 41%.

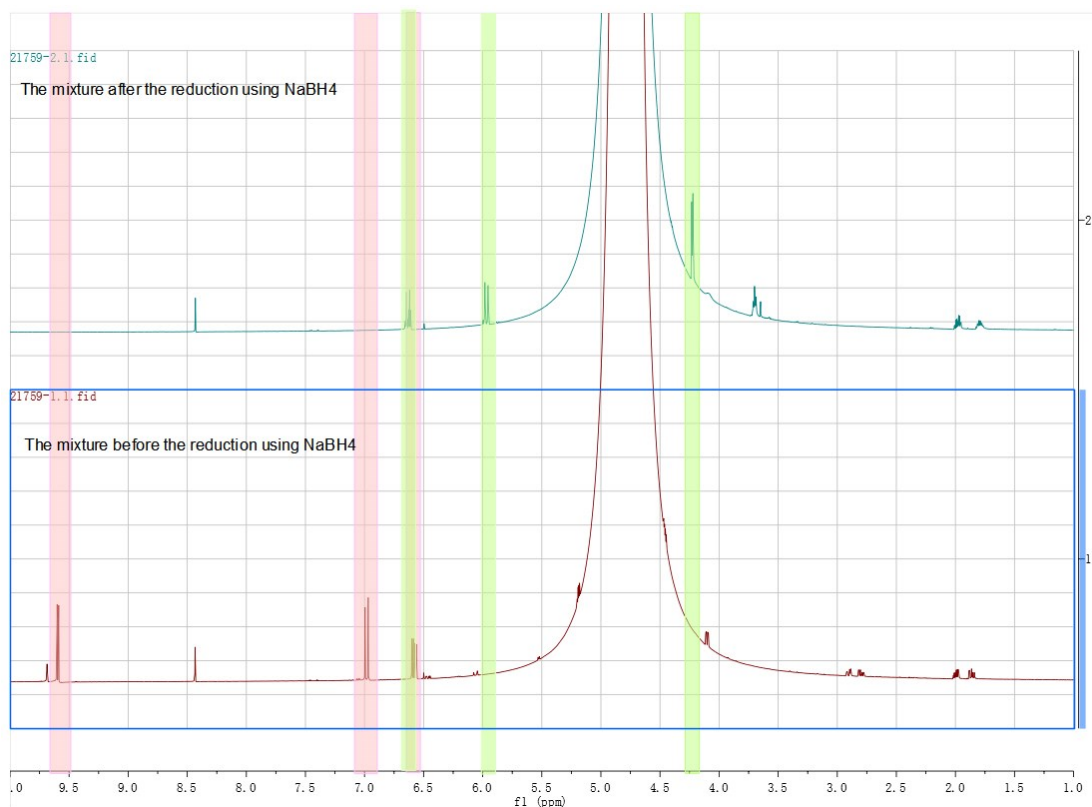

**Figure S8.** Comparison of the composition change of the reaction mixture before and after reduction using  $\text{NaBH}_4$ . Reaction conditions: 50 mM furfural, 50 mg/mL *E. coli*\_CtVDH2\_NOX cells, 4 mL phosphate buffer (0.2 M, pH 7), 150 r/min, 30 °C, 2 h; removing cells, then adding 5 mol% EY@DVB, 30 W green LEDs (530-540 nm), 25 °C, 200 r/min, 24 h; adding 1.2 eq.  $\text{NaBH}_4$ , 150 r/min, 30 °C, 1 h; after 0.48 mL of sample was withdrawn from the reaction mixture, followed by adding 0.12 mL of  $\text{D}_2\text{O}$ ,  $^1\text{H}$  NMR spectra were recorded.

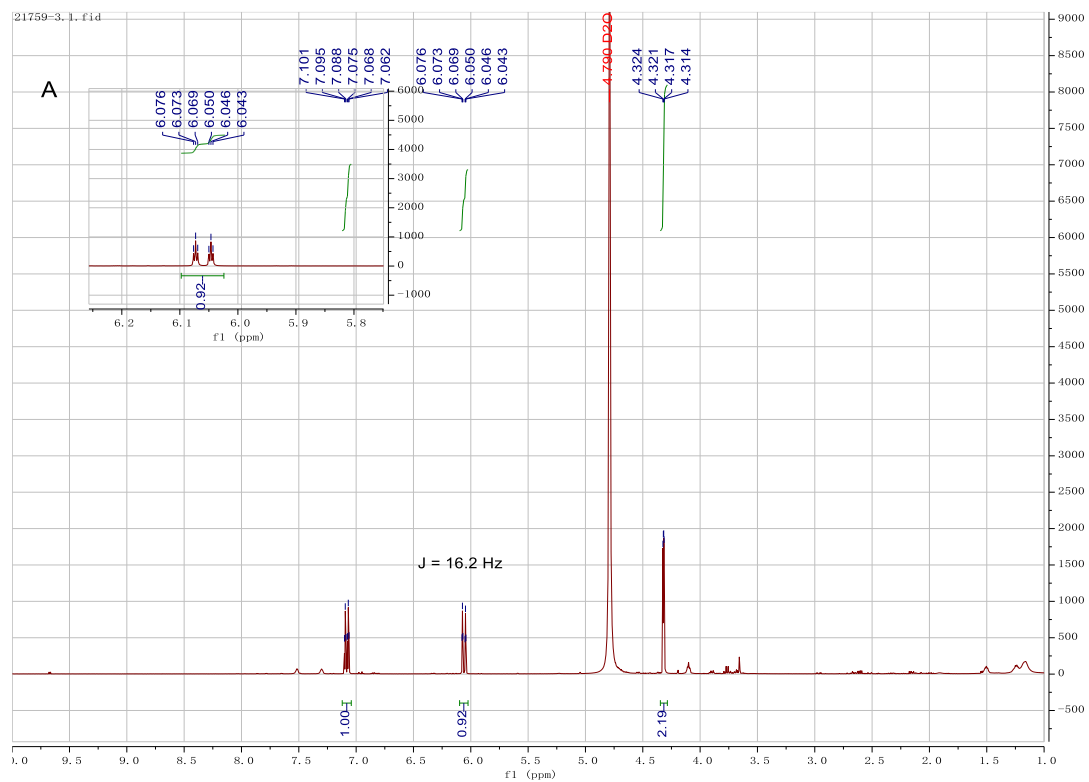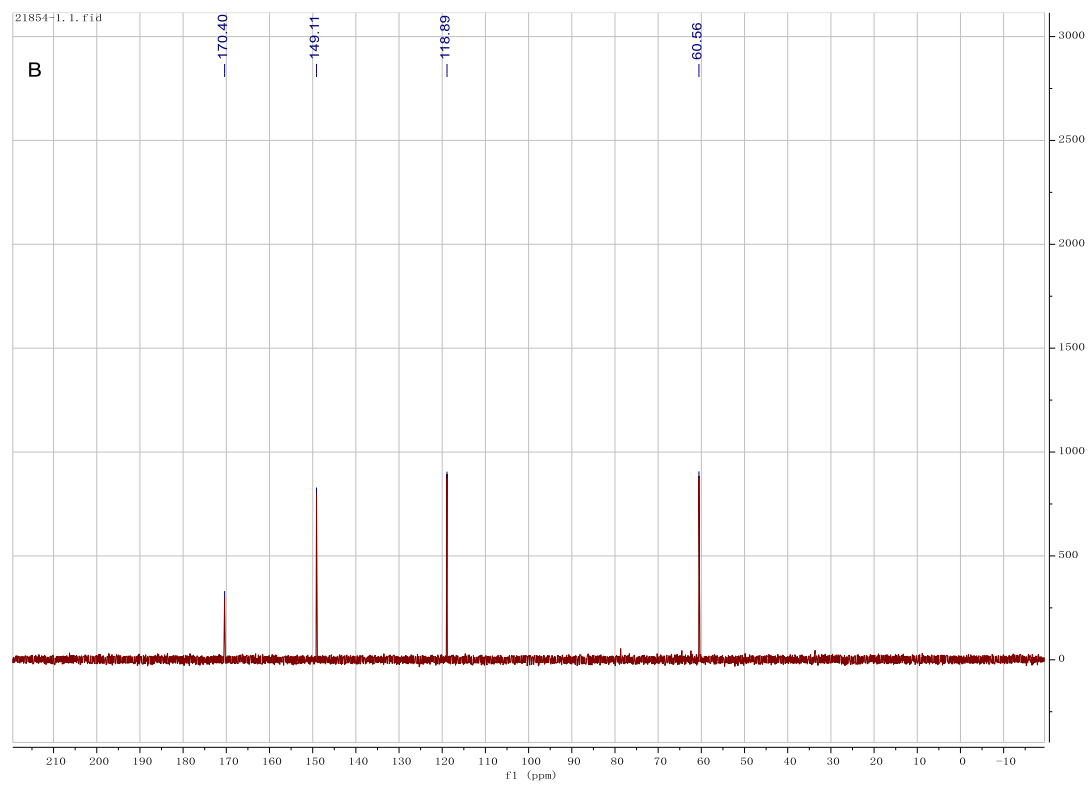

**Figure S9.**  $^1\text{H}$  (A) and  $^{13}\text{C}$  (B) NMR spectra of HBA (in  $\text{D}_2\text{O}$ , 600 mM)

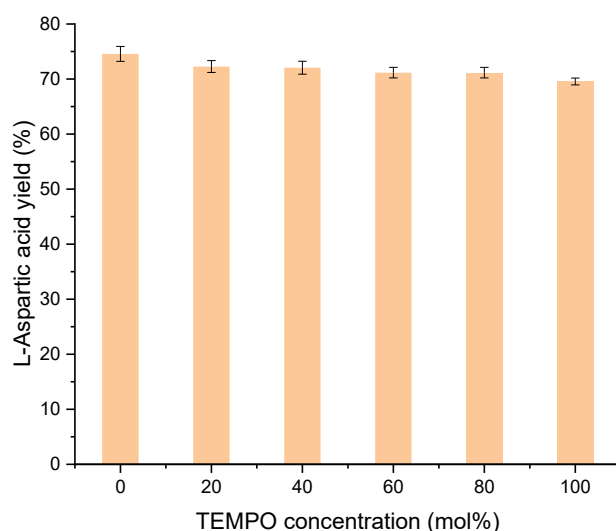

**Figure S10.** Effect of the TEMPO concentrations on the synthesis of L-Asp by *E. coli*\_EcAspA. Reaction conditions: 50 mM FA, 50 mg/mL *E. coli*\_EcAspA cells, 0-100 mol% TEMPO, 4 mL phosphate buffer (0.2 M, pH 7), 1 mM MgCl<sub>2</sub>, 350 mM NH<sub>3</sub> (after adding NH<sub>3</sub>, pH of the reaction mixture was changed to around 8.5), 150 r/min, 30 °C, 2 h.

Table S4. One-pot, four-step synthesis of amino acids

| Entry | TEMPO (mol%) | Biocatalyst <sup>a</sup>                          | Time (h)        | Product | Yield (%)           |
|-------|--------------|---------------------------------------------------|-----------------|---------|---------------------|
| 1     | 40           | <i>E. coli</i> _EcAspA                            | 52 (2+24+24+2)  | L-Asp   | 64                  |
| 2     | 60           | <i>E. coli</i> _EcAspA                            | 40 (2+24+12+2)  | L-Asp   | 62                  |
| 3     | 80           | <i>E. coli</i> _EcAspA                            | 40 (2+24+12+2)  | L-Asp   | 63                  |
| 4     | 100          | <i>E. coli</i> _EcAspA                            | 34 (2+24+6+2)   | L-Asp   | 57                  |
| 5     | 80           | <i>E. coli</i> _EcAspA and <i>E. coli</i> _CgPanD | 50 (2+24+12+12) | β-Ala   | 75 (2) <sup>a</sup> |

Reaction conditions: 50 mM furfural, 50 mg/mL *E. coli*\_CtVDH2\_NOX cells, 4 mL phosphate buffer (0.2 M, pH 7), 150 r/min, 30 °C, 2 h; removing cells, then adding 5 mol% EY@DVB, 30 W green LEDs (530-540 nm), 25 °C, 200 r/min, 24 h; tuning pH to 5, then adding 5 mg/mL laccase and 40-100 mol% TEMPO, 150 r/min, 30 °C, 6-24 h; adding approximately 350 mM aqueous ammonia to tune pH to 8.5, followed by adding 50 mg/mL *E. coli*\_EcAspA cells and 1 mM MgCl<sub>2</sub>, 150 r/min, 30 °C, 2 h; for β-alanine synthesis, tuning pH to 7 by adding approximately 200 mM aqueous ammonia, followed by adding 50 mg/mL *E. coli*\_EcAspA, 50 mg/mL *E. coli*\_CgPanD and 1 mM MgCl<sub>2</sub>, 150 r/min, 30 °C, 12 h. <sup>a</sup> the value in parenthesis represents the yield of L-aspartic acid.

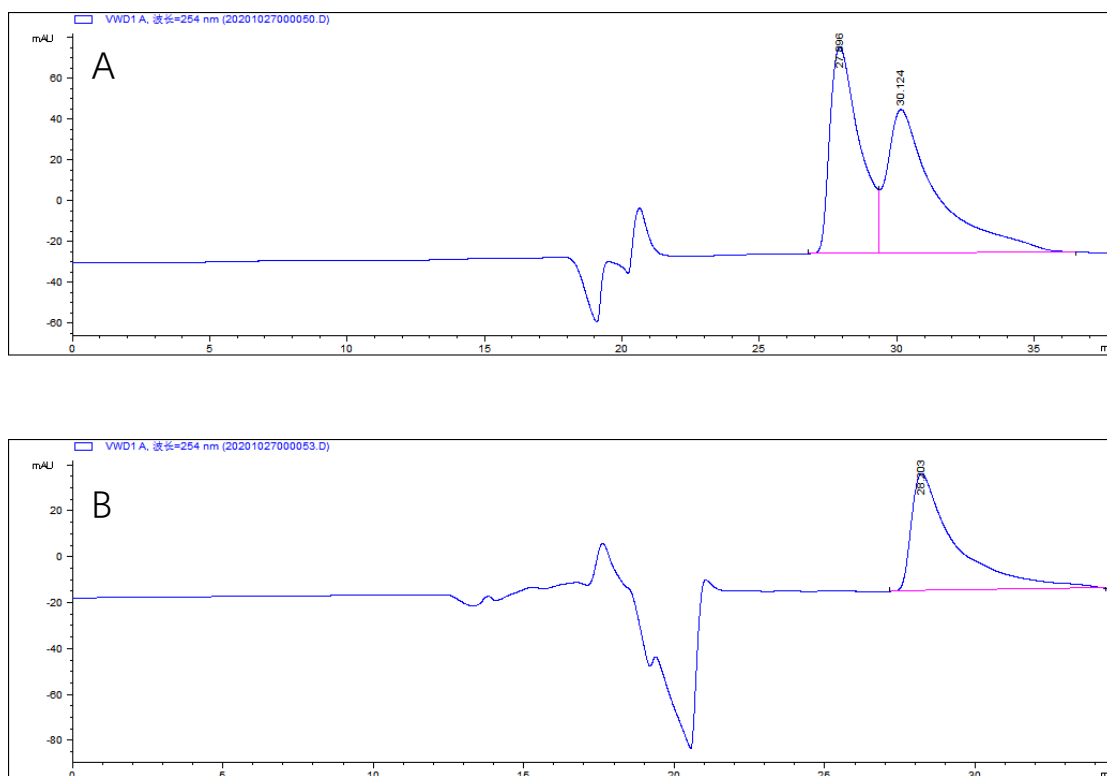

**Figure S11.** Chiral analysis of the product configuration: (A) racemic aspartic acid; (B) the product produced in the cascade reaction. Retention times of L- and D-Asp were 27.9 and 30.1 min, respectively.

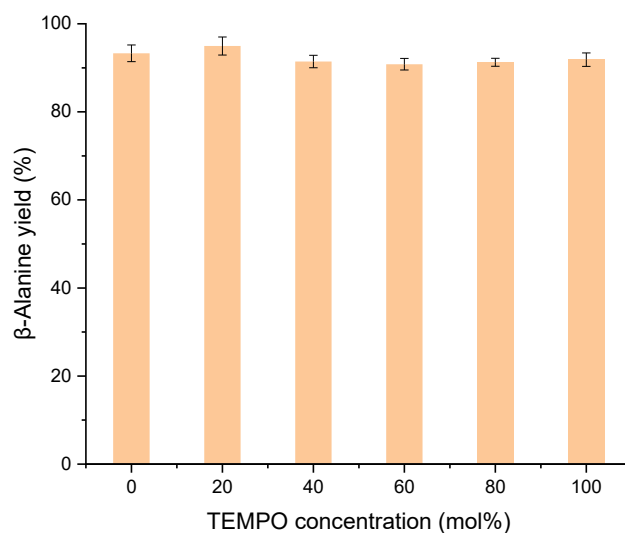

**Figure S12.** Effect of the TEMPO concentrations on the synthesis of  $\beta$ -Ala by *E. coli*\_CgPanD. Reaction conditions: 50 mM L-Asp, 50 mg/mL *E. coli*\_CgPanD cells, 0-100 mol% TEMPO, 4 mL phosphate buffer (0.2 M, pH 7), 150 r/min, 30 °C, 8 h.

**Table S5.** Estimation of waste generated in the scale-up synthesis of L-Asp (without consideration of the product purification)

| Component       | E factor contribution (kg waste per kg product) |
|-----------------|-------------------------------------------------|
| Water           | 156.6                                           |
| Buffer salt     | 4.1                                             |
| EY@DVB          | 2.3                                             |
| Cells           | 3.9                                             |
| Laccase         | 0.8                                             |
| TEMPO           | 2.0                                             |
| NH <sub>3</sub> | 0.7                                             |
| Sum             | 170.4                                           |

### HPLC chromatograms

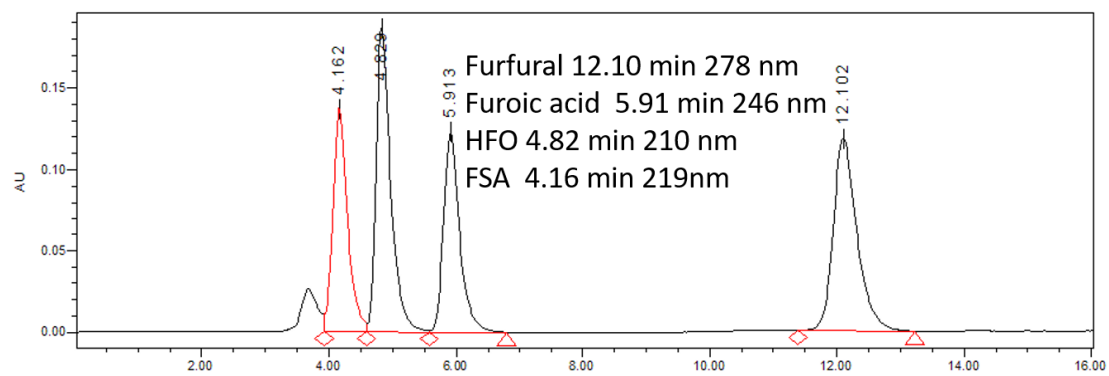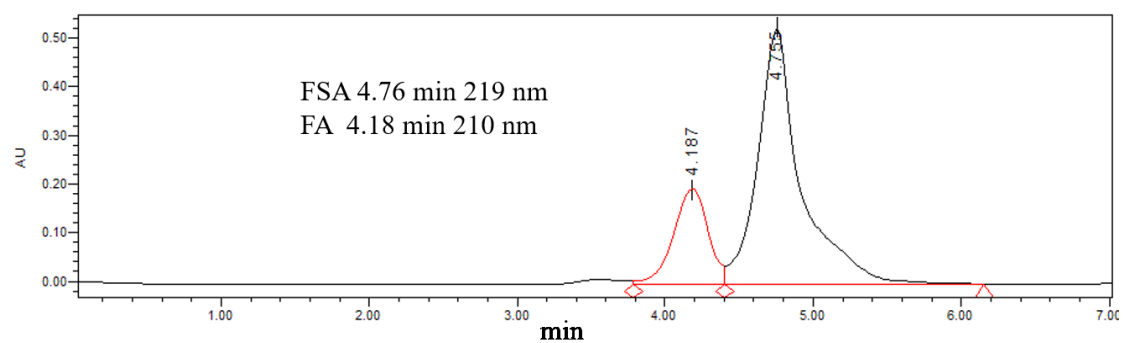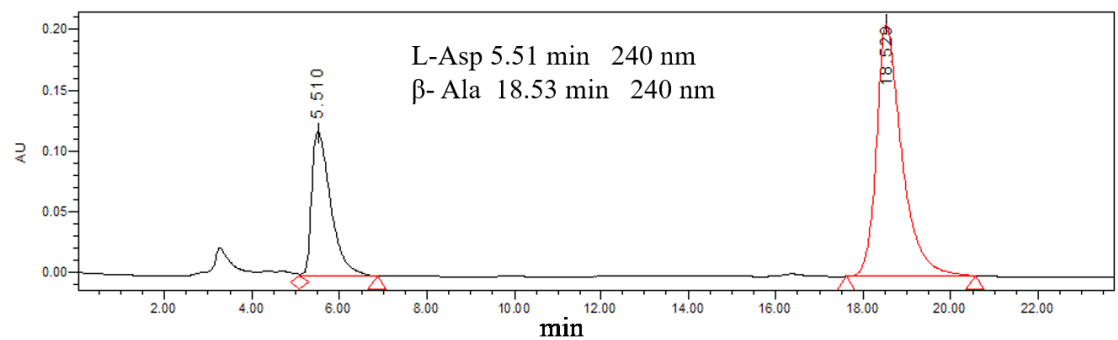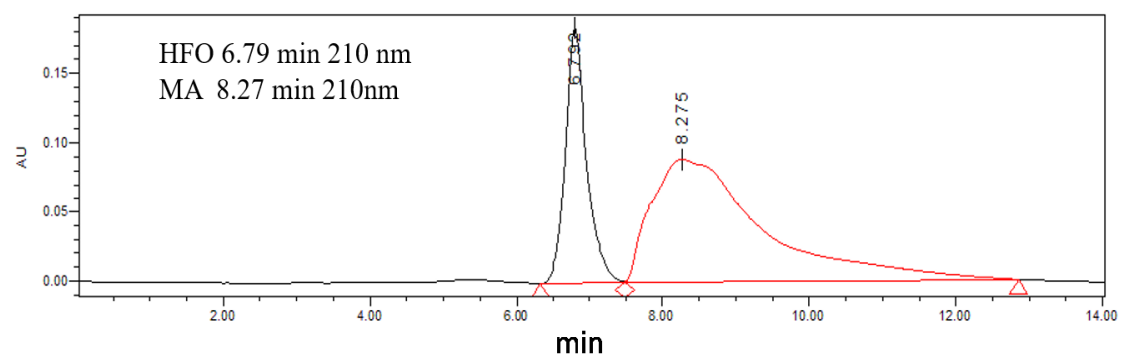



### Calibration curves

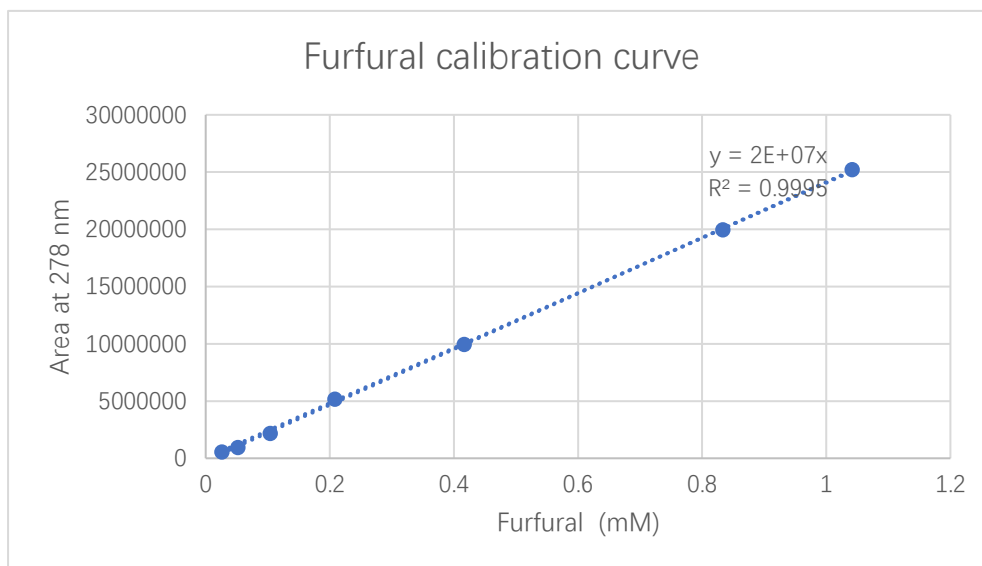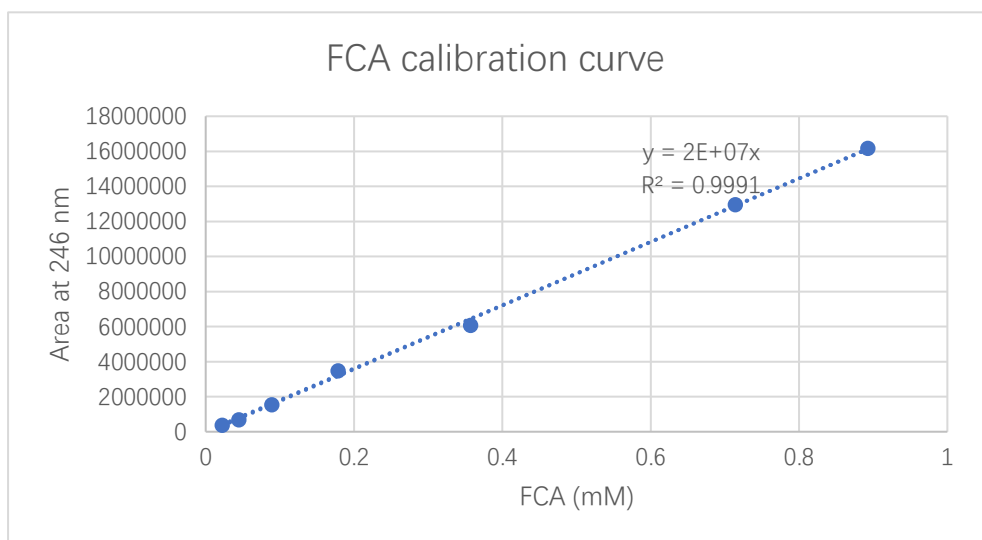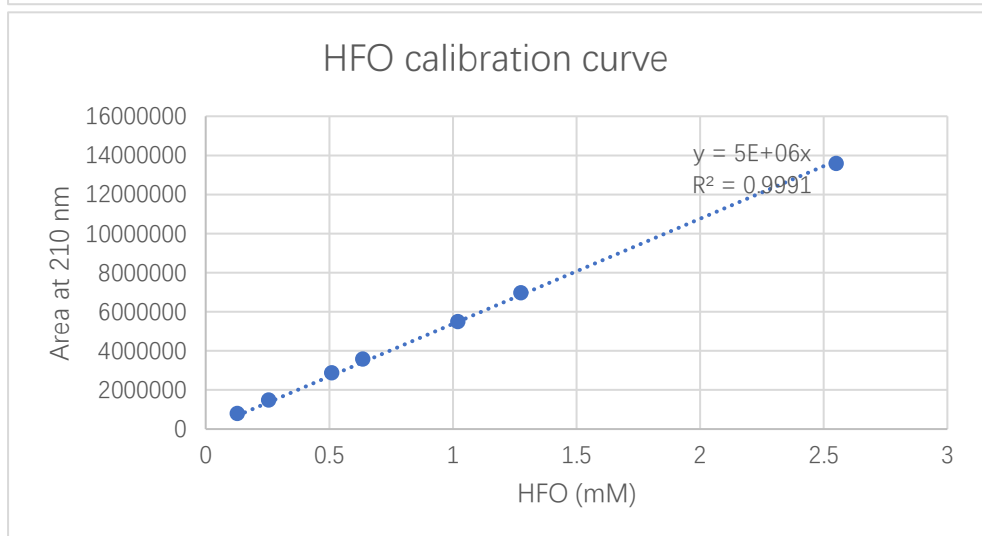

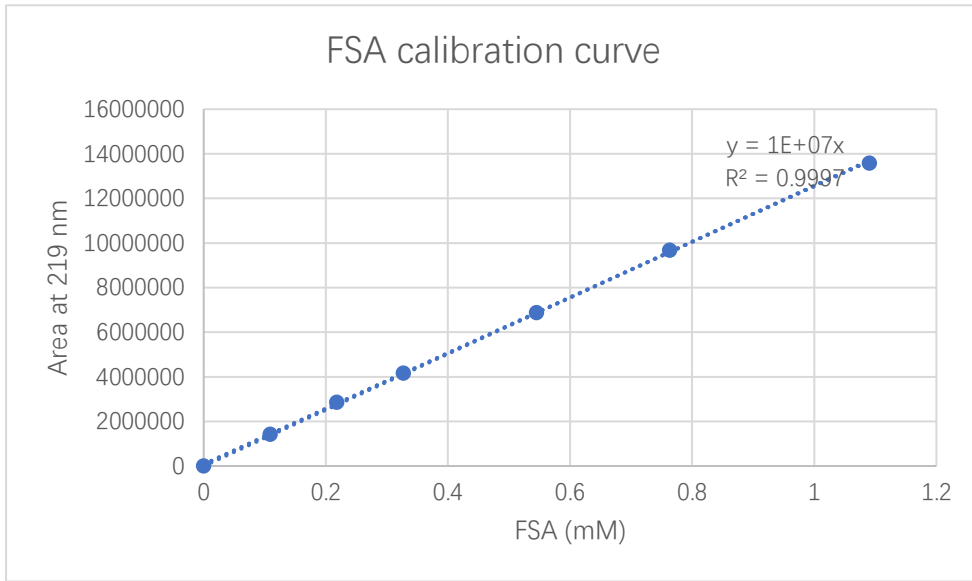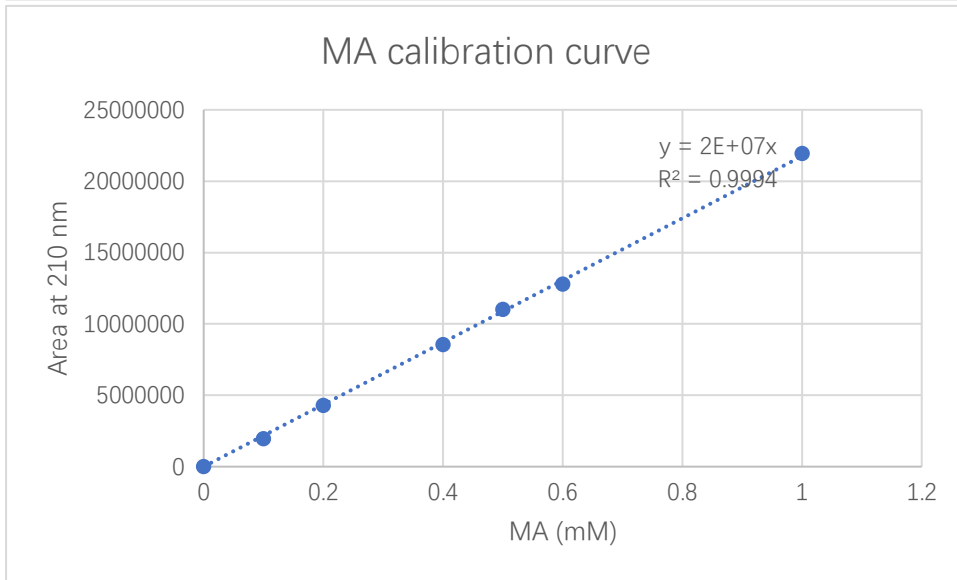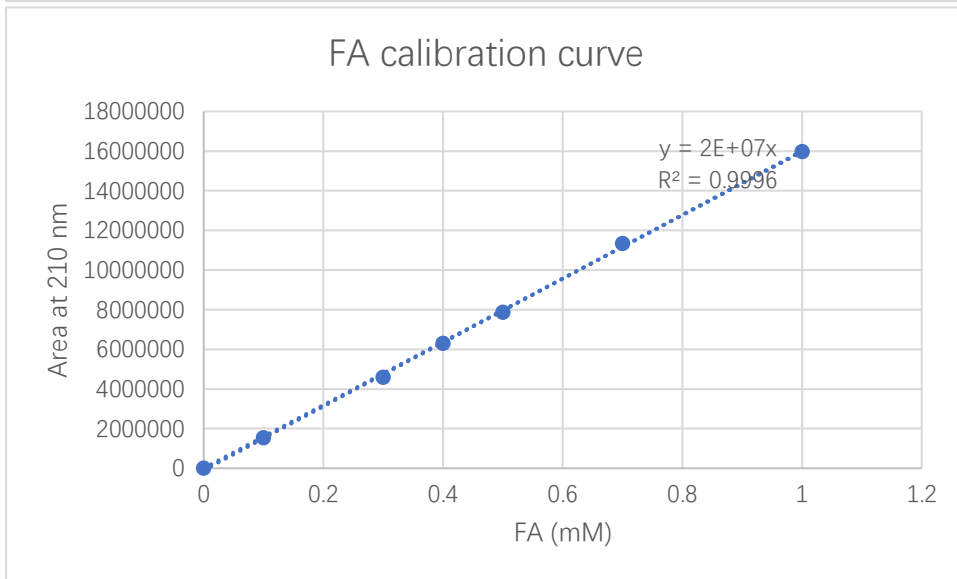

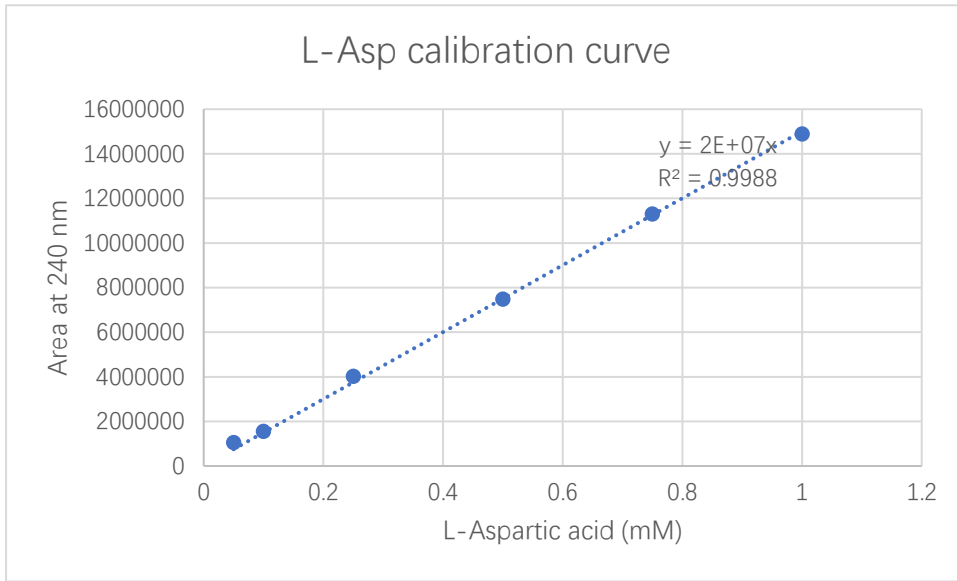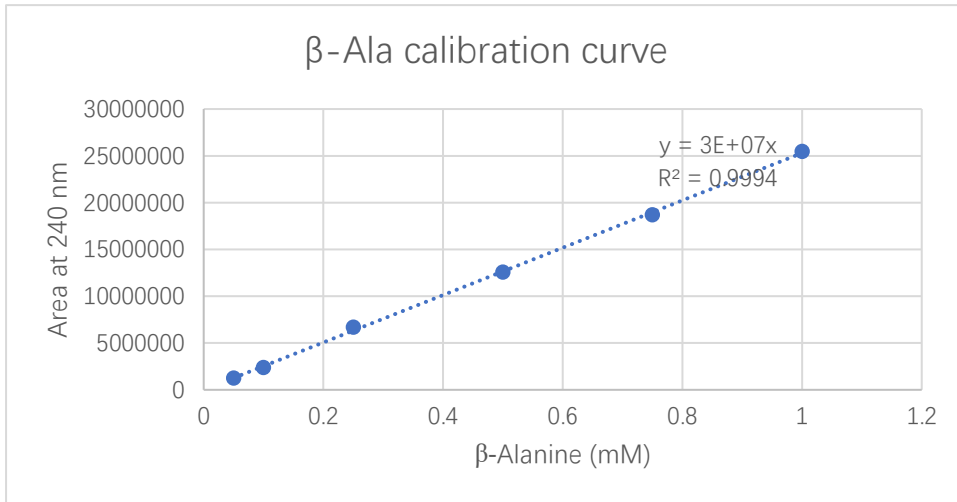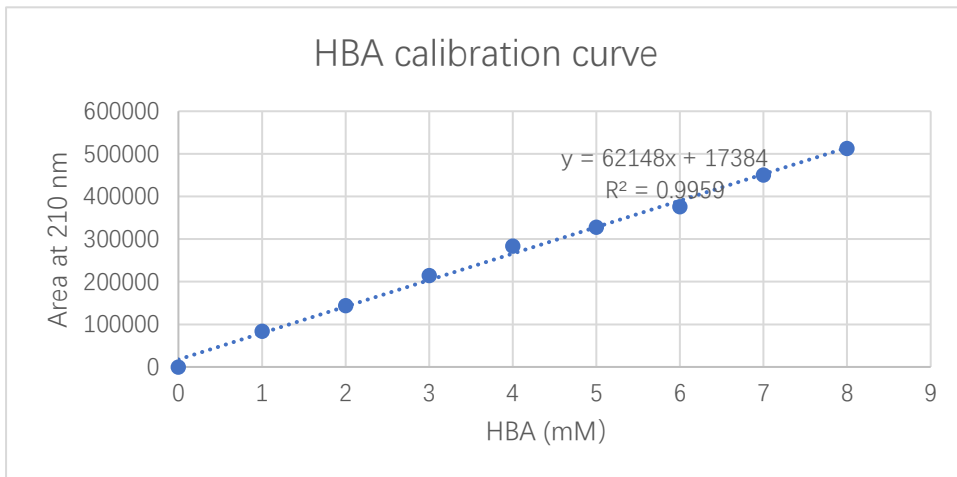

#### EcAspA gene sequence

ATGTCAAACAACATTTCGTATCGAAGAAGATCTGTTGGGTACCAGGGAAGTCCAGCTGATGCCT  
ACTATGGTGTTACACTCTGAGAGCGATTGTAACTTCTATATCAGCAACAACAAAATCAGTGAT  
ATTCCTGAATTTGTTTCGCGGTATGGaAATGGTTAAAAAGCCGCAGCTATGGCAAACAAAGAGC  
TGCAAACCATTCTAAAAGTGTAGCGAATGCCATCATTGCCGCATGTGATGAAGTCCTGAACAA  
CGGAAAATGCATGGATCAGTTCCCGGTAGACGTCTACCAGGGCGGCGCAGGTACTTCCGTAAA  
CATGAACACCAACGAAGTGCTGGCCAATATCGGTCTGGAAGTATGGGTACCAAAAAAGGTGA  
ATATCAGTACCTGAACCCGAACGACCATGTTAACAATGTCAGTCCACTAACGACGCCTACCCG  
ACCGGTTTCCGTATCGCAGTTTACTCTTCCCTGATTAAGCTGGTAGATGCGATTAACCAACTGCG  
TGAAGGCTTTGAACGTAAAGCTGTGCAATTCAGGACATCCTGAAAATGGGTCTGACCCAGCTG  
CAGGACGCAGTACCGATGACCCTCGGTGAGGAATTCGCGCTTTCAGCATCCTGCTGAAAGAA  
GAAGTGA AAAACATCCAACGTACCGCTGAACTGCTGCTGGAAGTTAACCTTGGTGAACAGCA  
ATCGGTACTGGTCTGAACACGCCGAAAGAGTACTCTCCGCTGGCAGTGA AAAAACTGGCTGAA  
GTTACTGGCTTCCCATGCGTACCGGCTGAAGACCTGATCGAAGCGACCTCTGACTGCGGCGCTT  
ATGTTATGGTTCACGGCGCGCTGAAACGCCTGGCTGTGAAGATGTCCAAAATCTGTAACGACCT  
GCGCTTGCTCTTTCAGGCCACGTGCCGGCCTGAACGAGATCAACCTGCCGGAAGTGCAGGC  
GGGCTCTCCATCATGCCAGCTAAAGTAAACCCGGTTGTTCCGGAAGTGGTTAACAGGTATGC  
TTCAAAGTCATCGGTAACGACACCACTGTTACCATGGCAGCAGAAGCAGGTCAGCTGCAGTTG  
AACGTTATGGAGCCGGTCATTGGCCAGGCCATGTTGGAATCCGTTACATTCTGACCAACGCTT  
GCTACAACCTGCTGAAAAATGCATTAACGGCATCACTGCTAACAAAGAAGTGTGCGAAGGTT  
ACGTTTACAACCTATCGGTATCGTTACTTACCTGAACCCGTTTCATCGGTACCACAACGGTGAC  
ATCGTGGGTAAAATCTGTGCCGAAACCGGTAAGAGTGTACGTGAAGTCGTTCTGGAACGCGGT  
CTGTTGACTGAAGCGGAACTTGACGATATTTTCTCCGTACAGAATCTGATGCACCCGGCTTACAA  
AGCAAACGCTATACTGATGAAAGCGAACAGTAA

#### CgPanD gene sequence

ATGCTGCGCACCATCCTCGGAAGTAAGATTCACCGAGCCACTGTCACTCAAGCTGATCTAGATT  
ATGTTGGCTCTGTAACCATCGACGCCGACCTGGTTCACGCCCGGATTGATCGAAGGCGAAA  
AAGTTGCCATCGTAGACATCACCAACGGCGCTCGTCTGGAACTTATGTCATTGTGGGCGACGC  
CGAACGGGCAATATTTGCATCAATGGTGCCGCTGCACACCTTATTAATCCTGGCGATCTTGTG  
ATCATCATGAGCTACCTTCAGGCAACTGATGCGGAAGCCAAGGCGTATGAGCCAAAGATTGTG  
CACGTGGACGCCGACAACCGCATCGTTGCGCTCGGCAACGATCTTGC GGAAGCACTACCTGGA  
TCCGGGCTTTTGACGTGCGAGAAGCATTAG

#### References

1. Z. Liu, L. Yu, L. Zhou and Z. Zhou, *Appl. Environ. Microbiol.*, 2019, **85**, e01327-01319.
2. W. Cui, Z. Shi, Y. Fang, L. Zhou, N. Ding and Z. Zhou, *Biotechnol. Lett.*, 2014, **36**, 121-126.
3. X.-Y. Zhang, X. Wang, N.-W. Li, Z.-W. Guo, M.-H. Zong and N. Li, *ChemCatChem*, 2020, **12**, 3257–3264.
